# Supplementary material for: Chronic non-freezing cold injury results in neuropathic pain due to a sensory neuropathy
Source: PubMed Central journal article supplement (PMC5841153; doi:10.1093/brain/awx215), 2017-08-31
Supplement: awx215_supp_figure2.pdf [file awx215_supp_figure2.pdf]

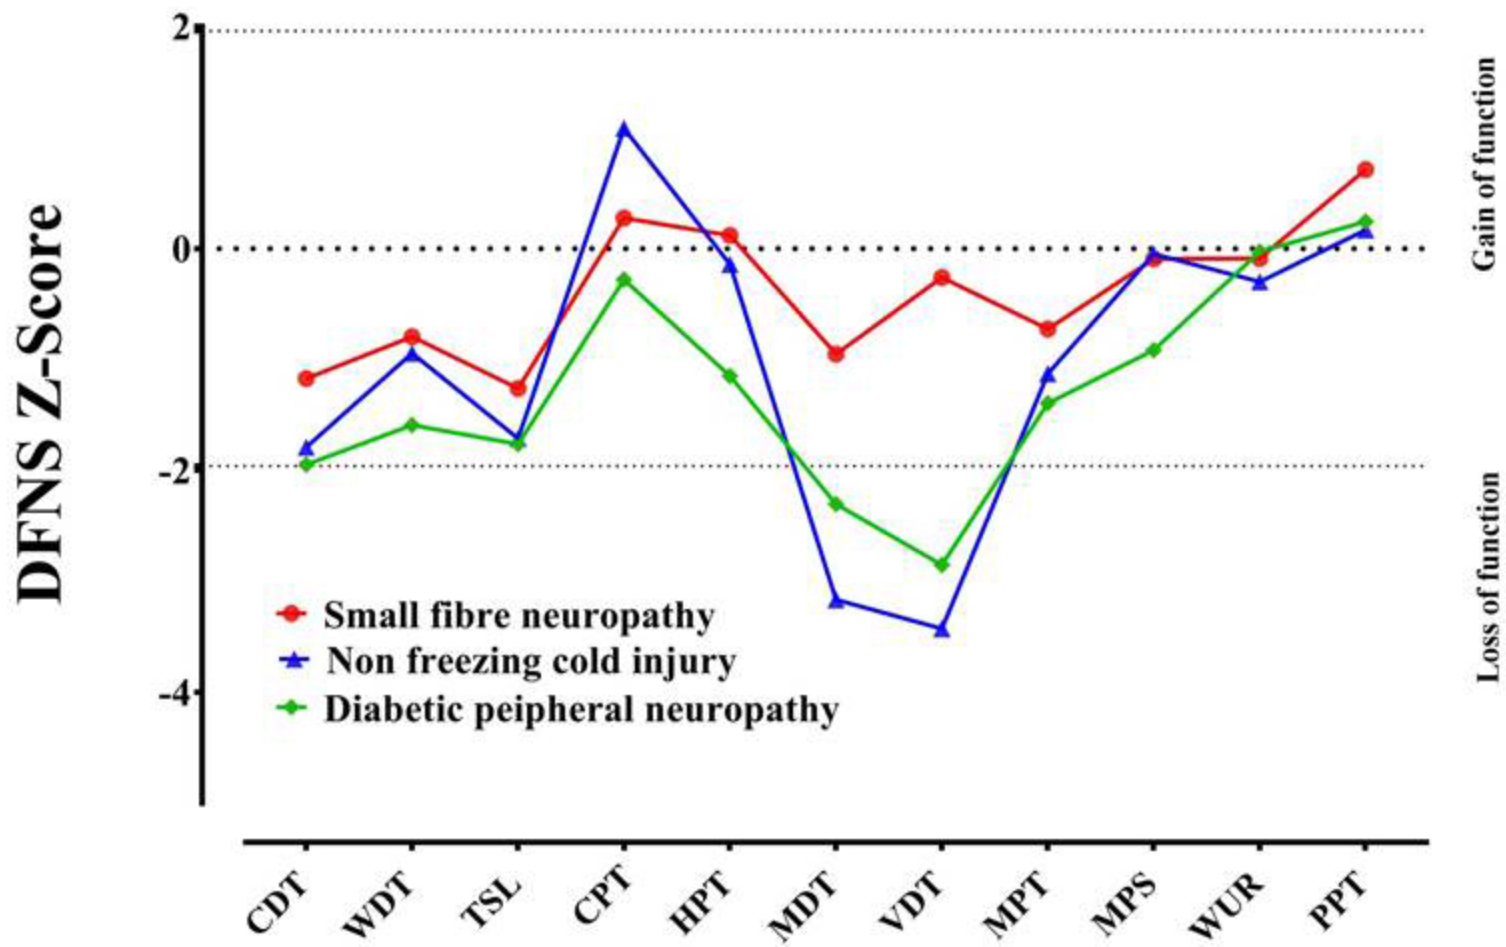

Supplementary Figure 2
