# Supplementary material for: Chronic non-freezing cold injury results in neuropathic pain due to a sensory neuropathy
Source: PubMed Central journal article supplement (PMC5841153; doi:10.1093/brain/awx215), 2017-08-31
Supplement: awx215_supp_table1.pdf [file awx215_supp_table1.pdf]

|                                              |                         |
|----------------------------------------------|-------------------------|
| <b>Analgesic use</b>                         | <b>30/42 (69.8%)</b>    |
| - Monotherapy                                | 17 (56.7%)              |
| - Multiple analgesics                        | 13 (43.3%)              |
| <b>Tricyclic Antidepressants</b>             |                         |
| - Amitriptyline                              | 14 (46.7%)              |
| - Nortriptyline                              | 3 (10.0%)               |
| <b>Gabapentinoids</b>                        |                         |
| - Gabapentin                                 | 7 (23.4%)               |
| - Pregabalin                                 | 8 (26.7%)               |
| <b>NSAIDS</b>                                |                         |
| - Naproxen                                   | 3 (10.0%)               |
| - Meloxicam                                  | 1 (3.3%)                |
| <b>Opioid</b>                                |                         |
| - Oral morphine                              | 1 (3.3%)                |
| - Codeine containing                         | 6 (20.0%)               |
| - Tramadol                                   | 4 (13.3%)               |
| <b>Topical therapies</b>                     |                         |
| - Ibuprofen                                  | 1 (3.3%)                |
| - Lidocaine                                  | 3 (10.0%)               |
| <b>Other</b>                                 |                         |
| - Carbamazepine<br>(prescribed for headache) | 1 (3.3%)                |
| <b>BPI Pain relief</b>                       | <b>40% (17.5-60.0%)</b> |

**Supplementary Table 1**
