# Supplementary material for: Chronic non-freezing cold injury results in neuropathic pain due to a sensory neuropathy
Source: PubMed Central journal article supplement (PMC5841153; doi:10.1093/brain/awx215), 2017-08-31
Supplement: awx215_supp_table2.pdf [file awx215_supp_table2.pdf]

| Modality   | Foot (Mean skin temperature 28.6 °C) |                            |                         |                         | Hand (Mean skin temperature 31.2 °C) |                          |                         |                         |
|------------|--------------------------------------|----------------------------|-------------------------|-------------------------|--------------------------------------|--------------------------|-------------------------|-------------------------|
|            | Absolute Value                       | Z Score                    | % with gain of function | % with loss of function | Absolute Value                       | Z score                  | % with gain of function | % with loss of function |
| <b>CDT</b> | 22.76 °C<br>(19.81-25.71)            | -1.79<br>(-2.33 - -1.25)   | 0                       | 41                      | 24.82 °C<br>(22.13 – 27.51)          | -2.86<br>(-3.58 - -2.14) | 0                       | 63                      |
| <b>WDT</b> | 40.18 °C<br>(38.58 – 41.78)          | -0.9433<br>(-1.32 - -0.56) | 0                       | 19                      | 40.53 °C<br>(38.65 – 42.41)          | -2.61<br>(-3.16 - -2.07) | 0                       | 70                      |
| <b>TSL</b> | 20.05 °C<br>(15.74 – 24.36)          | -1.71<br>(-2.18 - -1.24)   | 0                       | 33                      | 17.14 °C<br>(13.00 – 21.27)          | -2.93<br>(-3.39 - -2.46) | 0                       | 70                      |
| <b>CPT</b> | 20.36 °C<br>(16.68 – 24.05)          | 1.08<br>(0.65 – 1.52)      | 15                      | 0                       | 19.37 °C<br>(15.46 – 23.28)          | 0.89<br>(0.46 – 1.32)    | 0                       | 0                       |
| <b>HPT</b> | 45.91 °C<br>(44.23 – 47.59)          | -0.08<br>(-0.79 – 0.63)    | 11                      | 11                      | 45.60 °C<br>(43.80 – 47.40)          | -0.28<br>(-0.93 – 0.36)  | 7                       | 11                      |
| <b>MDT</b> | 196.70 mN<br>(105.00 – 288.40)       | -3.13<br>(-3.67 - -2.59)   | 0                       | 78                      | 66.99 mN<br>(34.60 – 99.37)          | -4.06<br>(-4.70 - -3.41) | 0                       | 89                      |
| <b>VDT</b> | 5.11<br>(4.34 – 5.89)                | -3.43<br>(-4.56 - -2.29)   | 0                       | 70                      | 5.77<br>(4.92 – 6.61)                | -5.29<br>(-9.11 – 0.61)  | 0                       | 62                      |
| <b>MPT</b> | 352.80 mN<br>(259.00 – 446.70)       | -1.14<br>(-1.60 - -0.69)   | 0                       | 22                      | 192.10 mN<br>(117.30 – 266.90)       | -0.15<br>(-0.73 – 0.43)  | 11                      | 7                       |
| <b>MPS</b> | 2.55<br>(-0.35 – 5.44)               | -0.16<br>(-0.78 – 0.46)    | 4                       | 0                       | 5.64<br>(1.32 – 9.96)                | 0.90<br>(0.23 – 1.57)    | 26                      | 0                       |
| <b>WUR</b> | 3.48<br>(1.38 – 5.59)                | -0.34<br>(-0.96 – 0.28)    | 9                       | 9                       | 2.73<br>(1.63 – 3.84)                | 0.06<br>(-0.59 – 0.70)   | 8                       | 0                       |
| <b>PPT</b> | 609.10 kPa<br>(513.20 – 705.00)      | 0.17<br>(-0.25 – 0.58)     | 0                       | 0                       | 498.70 kPa<br>(435.50 – 561.90)      | -0.01<br>(-0.38 – 0.36)  | 0                       | 0                       |

**Supplementary table 2**
