# Supplementary material for: Chronic non-freezing cold injury results in neuropathic pain due to a sensory neuropathy
Source: PubMed Central journal article supplement (PMC5841153; doi:10.1093/brain/awx215), 2017-08-31
Supplement: awx215_supp_table3.pdf [file awx215_supp_table3.pdf]

|                                     | <b>BPI Pain Severity</b> | <b>Time from injury to assessment</b> | <b>IENFD (fibres/mm)</b> |
|-------------------------------------|--------------------------|---------------------------------------|--------------------------|
| <b>Sensory sum score</b>            | 0.42**                   | -0.45**                               | 0.06                     |
| <b>BPI Pain Severity</b>            |                          | -0.10                                 | -0.12                    |
| <b>Time of injury to assessment</b> |                          |                                       | -0.22                    |

**Supplementary table 3**
