# Supplementary material for: Chronic non-freezing cold injury results in neuropathic pain due to a sensory neuropathy
Source: PubMed Central journal article supplement (PMC5841153; doi:10.1093/brain/awx215), 2017-08-31
Supplement: awx215_supp_table4.pdf [file awx215_supp_table4.pdf]

A)

| <b><u>Hand</u></b>                  | <b>CDT</b> | <b>WDT</b> | <b>TSL</b> | <b>CPT</b> | <b>HPT</b> | <b>MDT</b> | <b>VDT</b> | <b>MPT</b> | <b>MPS</b> | <b>WUR</b> | <b>PPT</b> |
|-------------------------------------|------------|------------|------------|------------|------------|------------|------------|------------|------------|------------|------------|
| <b>Sensory sum score</b>            | -0.52**    | -0.64**    | -0.62**    | -0.24      | -0.47*     | -0.73**    | -0.07      | -0.50**    | -0.24      | -0.13      | -0.47*     |
| <b>BPI Pain Severity</b>            | -0.12      | 0.01       | -0.12      | -0.02      | 0.13       | -0.18      | -0.22      | -0.15      | -0.12      | -0.07      | -0.15      |
| <b>IENFD (fibres/mm)</b>            | -0.14      | -0.36      | -0.20      | -0.32      | -0.57**    | -0.08      | 0.10       | -0.14      | 0.02       | -0.07      | -0.19      |
| <b>Time of injury to assessment</b> | 0.05       | 0.36       | 0.31       | -0.16      | 0.28       | 0.54**     | 0.09       | 0.23       | 0.14       | 0.41*      | 0.05       |

B)

| <b><u>Foot</u></b>                  | <b>CDT</b> | <b>WDT</b> | <b>TSL</b> | <b>CPT</b> | <b>HPT</b> | <b>MDT</b> | <b>VDT</b> | <b>MPT</b> | <b>MPS</b> | <b>WUR</b> | <b>PPT</b> |
|-------------------------------------|------------|------------|------------|------------|------------|------------|------------|------------|------------|------------|------------|
| <b>Sensory sum score</b>            | -0.60**    | -0.40*     | -0.62**    | -0.30      | -0.48*     | -0.82**    | -0.26      | -0.62**    | -0.44*     | -0.08      | -0.20      |
| <b>BPI Pain Severity</b>            | -0.20      | -0.02      | -0.16      | -0.05      | -0.13      | -0.23      | -0.22      | -0.05      | -0.15      | -0.10      | -0.07      |
| <b>IENFD (fibres/mm)</b>            | -0.09      | -0.14      | -0.16      | -0.07      | -0.40*     | 0.07       | 0.08       | -0.16      | -0.07      | -0.14      | -0.19      |
| <b>Time of injury to assessment</b> | 0.23       | 0.16       | 0.24       | -0.18      | 0.33       | 0.57**     | 0.33       | 0.26       | 0.14       | 0.18       | -0.10      |

**Supplementary table 4**
